# Supplementary material for: Mitophagy in Astrocytes Is Required for the Health of Optic Nerve
Source: MDPI journal article supplement (doi:10.3390/cells12202496), 2023-10-20
Supplement: s1 [file s1]

## Supplementary Figures and Legends

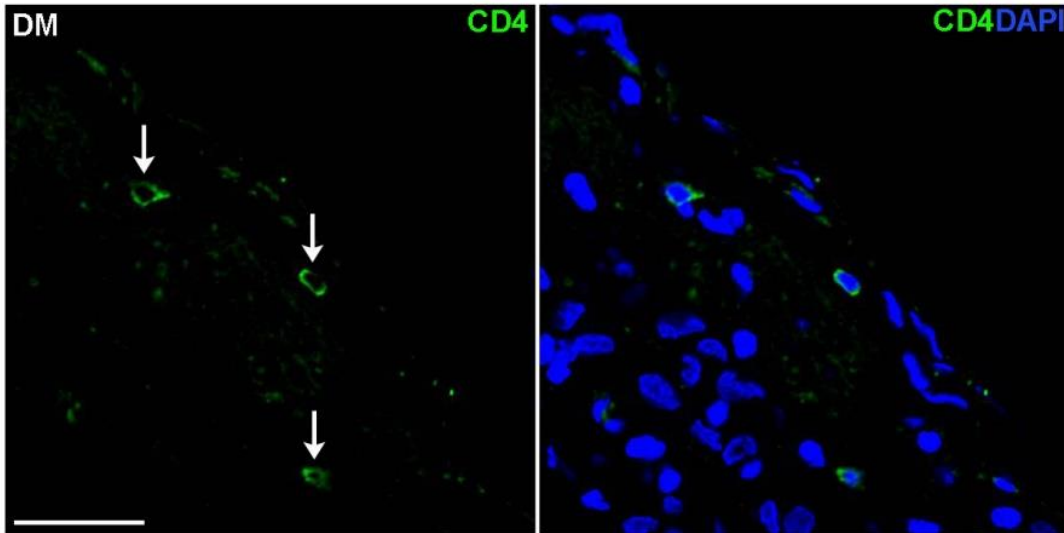

**Supplementary Figure S1.** Inflammation is activated in DM optic nerve. Immunohistochemical analysis of the DM optic nerve showed the presence of CD4-positive T lymphocytes (arrows). Scale bar: 50  $\mu\text{m}$ .

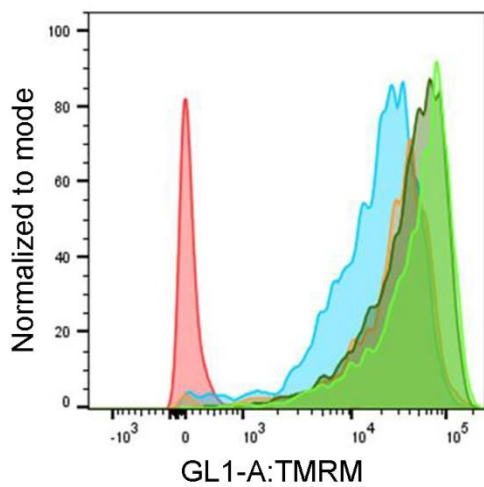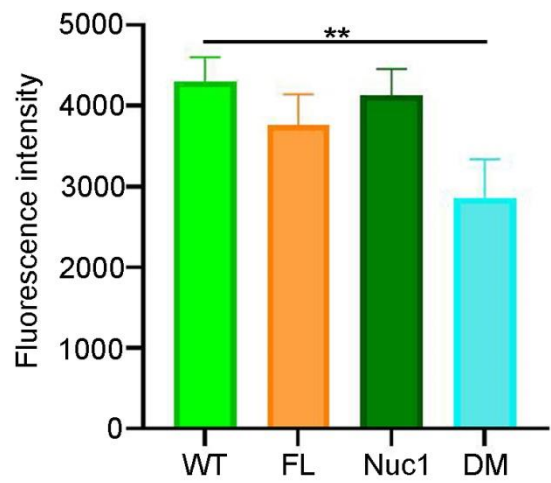

**Supplementary Figure S2.** The mitochondrial membrane potential is reduced in DM astrocytes. Representative TMRM fluorescence intensity histogram from a flow cytometric analysis shows significantly lower fluorescence intensity in DM astrocytes corresponding to lower membrane potential. Data are mean  $\pm$  SEM.  $n = 3$ , \*\*  $P < 0.01$ .

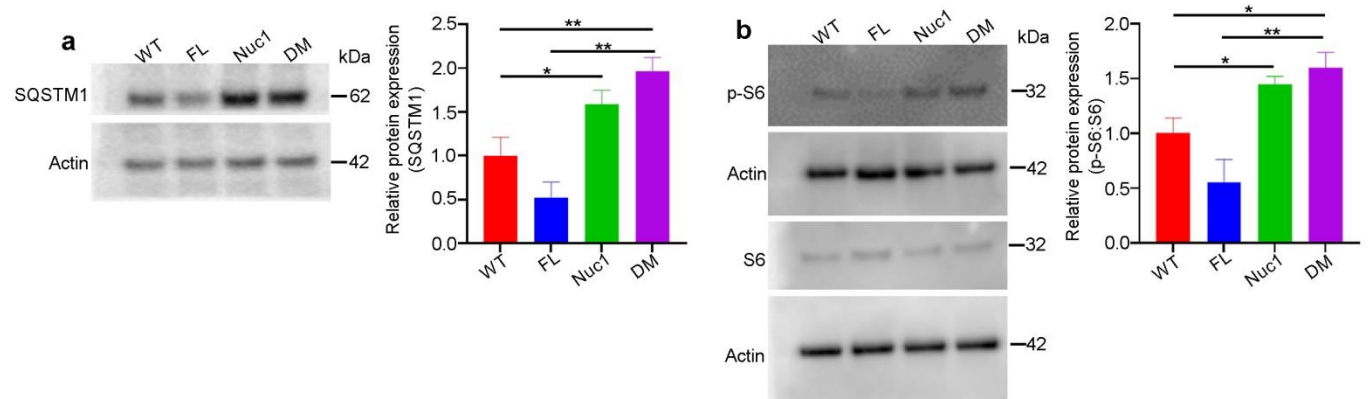

**Supplementary Figure S3.** mTORC1 is overactivated in DM optic nerves. **(a,b)** Optic nerves from all 4 genotypes were dissected and protein lysates were analyzed by immunoblotting. The representative immunoblotting images showed that the level of SQSTM1/p62, and the ratio of PS6:S6 are increased in the optic nerves of DM rats. Data are mean  $\pm$  SEM from 3 independent experiments repeated in triplicate. \*  $P < 0.05$ , \*\*  $P < 0.01$ .

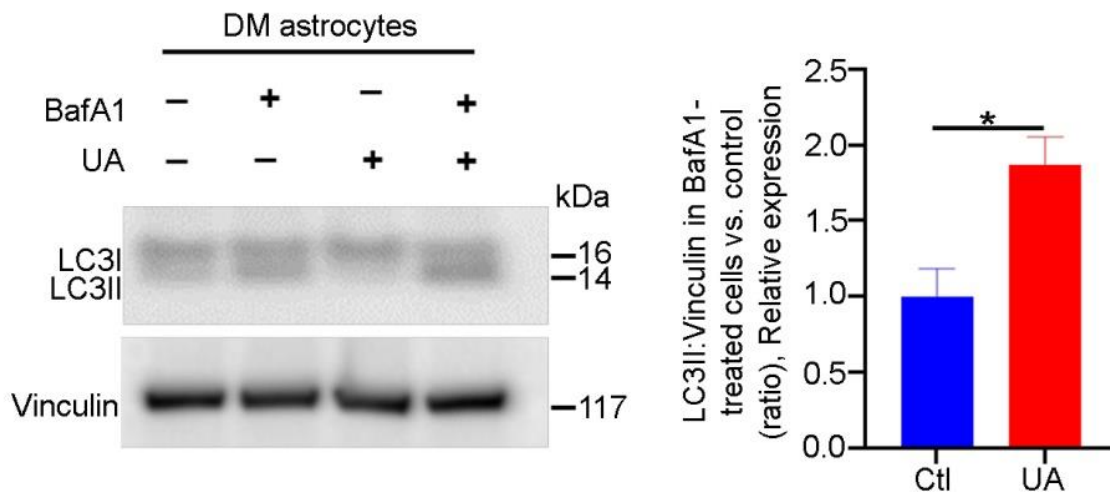

**Supplementary Figure S4.** UA treatment induces autophagy in DM astrocytes. DM astrocytes were treated with UA (25  $\mu$ M) for 24 h. In the last 3 h of culture, 50 nM BafA1 was added and the levels of autophagosome-positive LC3II isoform were analyzed by immunoblotting. A significant increase in the accumulation of autophagosomes positive for the LC3II isoform was observed in UA-treated cells relative to those untreated after BafA1 treatment. \*  $P < 0.05$ .
